# Supplementary material
Source: Springer Nature journal article supplement (https://www.springermedizin.de/resource/supplementary/12935_2010_255_MOESM4_ESM.pdf/9540156)

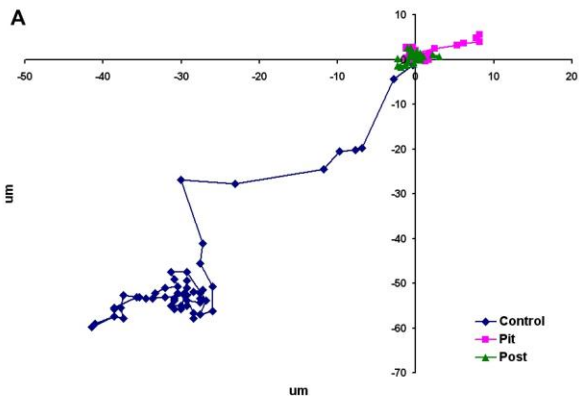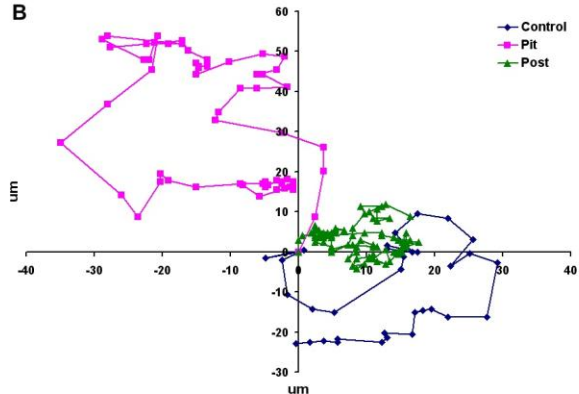

**C**

|             |         | Directed Diffusion                |                                     |               | Confined Diffusion                      |                             |               |
|-------------|---------|-----------------------------------|-------------------------------------|---------------|-----------------------------------------|-----------------------------|---------------|
|             |         | v<br>[ $\mu\text{m}/\text{min}$ ] | D<br>[ $\mu\text{m}^2/\text{min}$ ] | %<br>Directed | $D_M$<br>[ $\mu\text{m}^2/\text{min}$ ] | $\Lambda$ [ $\mu\text{m}$ ] | %<br>Confined |
| Standard    | Control | 0.224*<br>( $\pm 0.029$ )         | 1.011*<br>( $\pm 0.236$ )           | 54.0          | 0.500*<br>( $\pm 0.128$ )               | 4.160*<br>( $\pm 0.350$ )   | 46.0          |
|             | Pit     | 0.060*<br>( $\pm 0.020$ )         | 0.208*<br>( $\pm 0.123$ )           | 35.7          | 0.084*<br>( $\pm 0.016$ )               | 1.994**<br>( $\pm 0.330$ )  | 64.3          |
|             | Post    | 0.028<br>( $\pm 0.002$ )          | 0.017*<br>( $\pm 0.002$ )           | 28.0          | 0.022*<br>( $\pm 0.003$ )               | 0.805*<br>( $\pm 0.079$ )   | 72.0          |
| Transfected | Control | 0.032*<br>( $\pm 0.008$ )         | 3.442*<br>( $\pm 0.763$ )           | 63.0          | 4.200*<br>( $\pm 1.256$ )               | 8.764*<br>( $\pm 1.617$ )   | 37.0          |
|             | Pit     | 0.115*<br>( $\pm 0.017$ )         | 1.784*<br>( $\pm 0.365$ )           | 64.0          | 1.604*<br>( $\pm 0.444$ )               | 3.399**<br>( $\pm 0.647$ )  | 36.0          |
|             | Post    | 0.030<br>( $\pm 0.005$ )          | 0.131*<br>( $\pm 0.021$ )           | 20.0          | 0.098*<br>( $\pm 0.018$ )               | 1.837*<br>( $\pm 0.259$ )   | 80.0          |

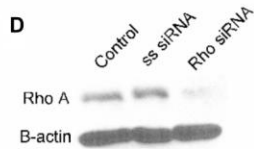

Supplement: MOESM4 [file 9540156]
